# Supplementary material for: Strict glycaemic control in very low birthweight infants using a continuous glucose monitoring system: a randomised controlled trial
Source: HighWire-hosted journal article supplement (doi:10.1136/archdischild-2020-320540), 2021-05-26
Supplement: archdischild-2020-320540supp001_data_supplement.pdf [file archdischild-2020-320540supp001_data_supplement.pdf]

## Supplement 1 – Parenteral intakes

|            |          | Day of life |     |     |     |      |      |      |      |      |      |
|------------|----------|-------------|-----|-----|-----|------|------|------|------|------|------|
|            |          | 1           | 2   | 3   | 4   | 5    | 6    | 7    | 8    | 9    | 10   |
| Glucose    | g/kg/d   | 6,0         | 7,0 | 8,0 | 9,0 | 10,0 | 11,5 | 13,0 | 14,5 | 16,0 | 16,0 |
| Lipids     | g/kg/d   | 1,5         | 1,5 | 2,0 | 2,0 | 2,5  | 3,0  | 3,0  | 3,0  | 3,5  | 3,5  |
| Aminoacids | g/kg/d   | 2,5         | 3,0 | 3,0 | 3,5 | 3,5  | 3,5  | 4,0  | 4,0  | 4,0  | 4,0  |
| Ca         | mg/kg/d  | 40          | 50  | 60  | 70  | 80   | 80   | 80   | 90   | 90   | 90   |
| P          | mg/kg/d  |             | 20  | 30  | 40  | 50   | 60   | 60   | 65   | 70   | 70   |
| Mg         | mg/kg/d  |             |     | 5   | 5   | 5    | 5    | 5    | 10   | 10   | 10   |
| Na         | mEq/kg/d |             |     |     | 3   | 3    | 3    | 3    | 4    | 4    | 4    |
| Cl         | mEq/kg/d |             |     |     | 3   | 3    | 3    | 3    | 4    | 4    | 4    |
| K          | mEq/kg/d |             |     |     | 3   | 3    | 3    | 3    | 4    | 4    | 4    |
