# Supplementary material for: Strict glycaemic control in very low birthweight infants using a continuous glucose monitoring system: a randomised controlled trial
Source: HighWire-hosted journal article supplement (doi:10.1136/archdischild-2020-320540), 2021-05-26
Supplement: archdischild-2020-320540supp004_data_supplement.pdf [file archdischild-2020-320540supp004_data_supplement.pdf]

**Supplement 4. Actual Mean Glucose Infusion Rate (GIR) by day (g/kg/day)**

| <b>GIR mean ev</b>      | <b>CLG</b>  | <b>STG</b>  | <b>P value</b> |
|-------------------------|-------------|-------------|----------------|
| <b>Day 1; mean (SD)</b> | 6.45 (0.79) | 6.44 (0.97) | .96            |
| <b>Day 2; mean (SD)</b> | 7.11 (0.8)  | 7.52 (1.22) | .18            |
| <b>Day 3; mean (SD)</b> | 7.66 (0.99) | 7.94 (1.35) | .42            |
| <b>Day 4; mean (SD)</b> | 8.09 (1.29) | 8.35 (1.61) | .55            |
| <b>Day 5; mean (SD)</b> | 8.96 (1.63) | 8.55 (1.58) | .39            |
| <b>Day 6; mean (SD)</b> | 9.36 (1.82) | 9.06 (2.18) | .61            |
| <b>Mean (SD)</b>        | 7.94 (1.10) | 7.98 (0.92) | .95            |
