# Supplementary figures and images for: Strict glycaemic control in very low birthweight infants using a continuous glucose monitoring system: a randomised controlled trial
Source: HighWire-hosted journal article supplement (doi:10.1136/archdischild-2020-320540), 2021-05-26

**Supplement 2.** CGMS: sensor and transmitter

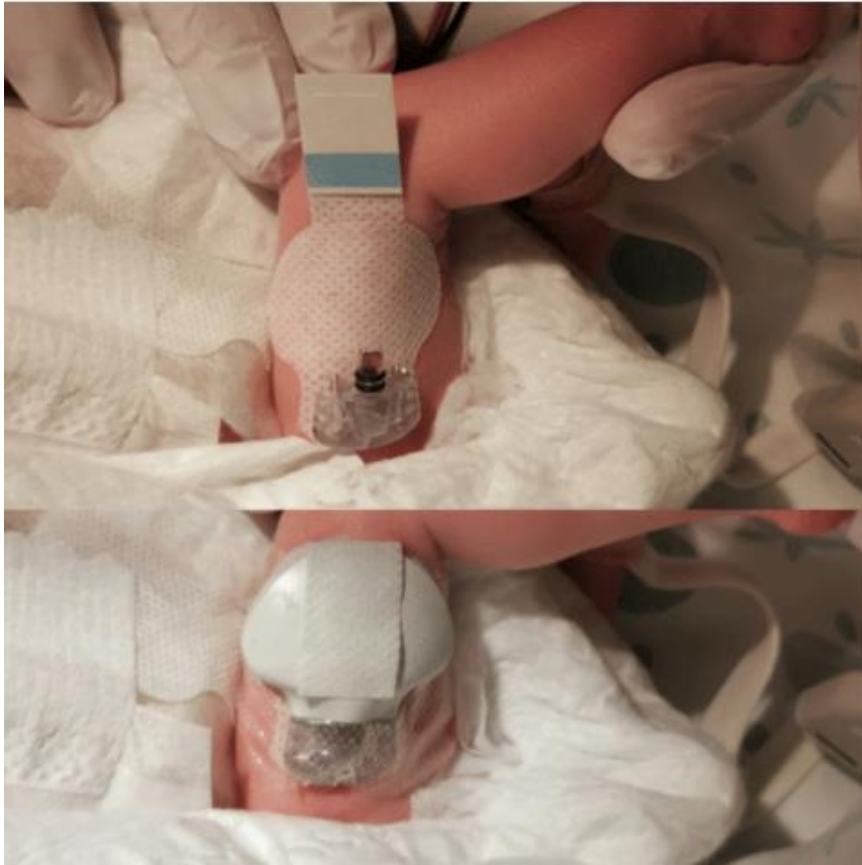

Supplement: archdischild-2020-320540supp002_data_supplement.pdf [file archdischild-2020-320540supp002_data_supplement.pdf]

**Supplement 3. Mean Glucose Infusion Rate by Day of Life (g/kg/day)**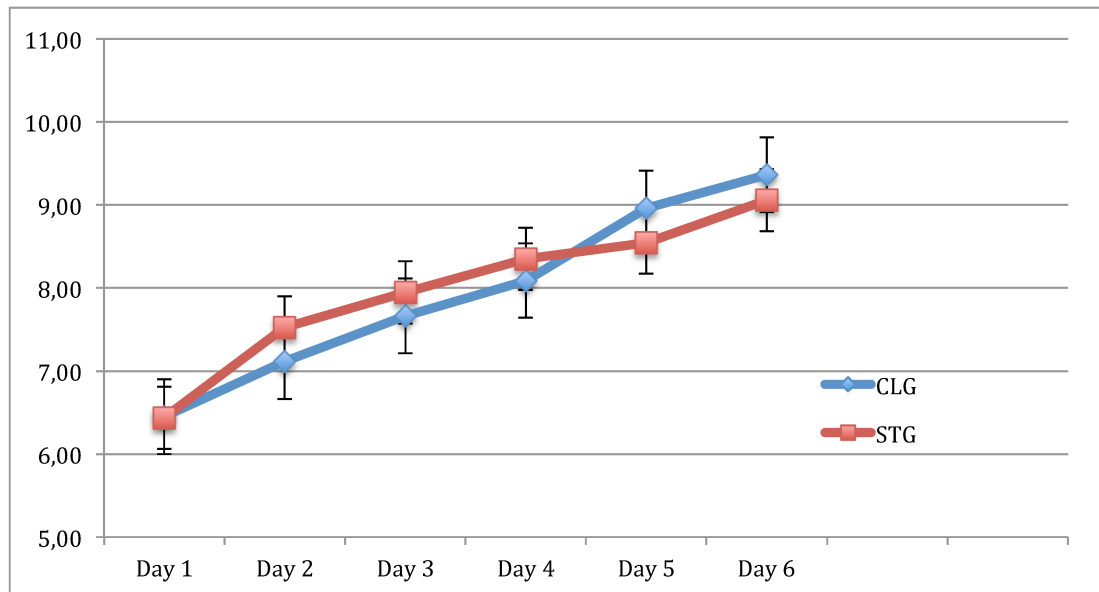

Supplement: archdischild-2020-320540supp003_data_supplement.pdf [file archdischild-2020-320540supp003_data_supplement.pdf]

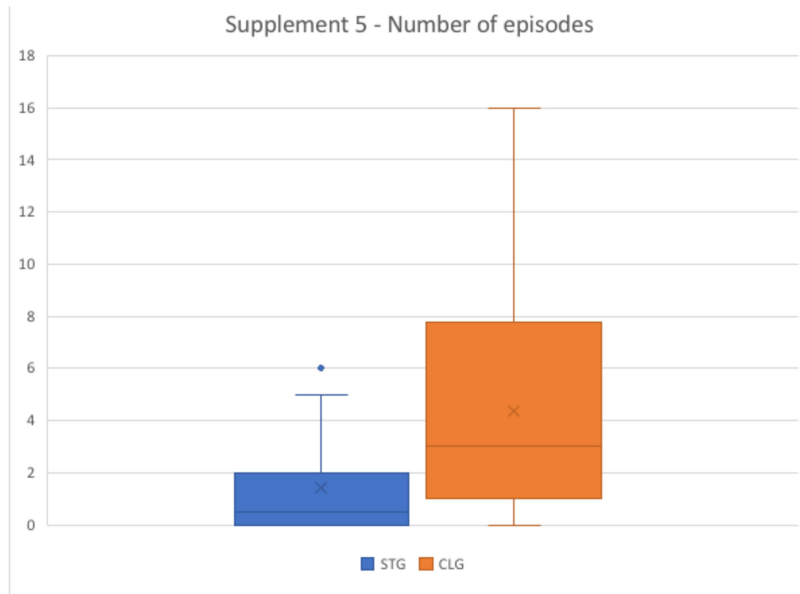

Supplement: archdischild-2020-320540supp005_data_supplement.pdf [file archdischild-2020-320540supp005_data_supplement.pdf]
